# Supplementary material for: Intracellular peptides in SARS-CoV-2-infected patients
Source: PubMed Central journal article supplement (PMC10448160; doi:10.1016/j.isci.2023.107542), 2023-08-06
Supplement: mmc1.pdf [file mmc1.pdf]

iScience, Volume 26

## **Supplemental information**

### **Intracellular peptides in SARS-CoV-2-infected patients**

**Luiz Felipe Martucci, Rosangela A.S. Eichler, Renée N.O. Silva, Tiago J. Costa, Rita C. Tostes, Geraldo F. Busatto, Marilia C.L. Seelaender, Alberto J.S. Duarte, Heraldo P. Souza, and Emer S. Ferro**

## Supplemental data items

Table S5. Peptide group comparisons according to sex, related to Table 2

|                   | M/C  |        | S/C  |        | D/C  |        |
|-------------------|------|--------|------|--------|------|--------|
|                   | Male | Female | Male | Female | Male | Female |
| <b>APOC2</b>      |      |        |      |        |      |        |
| GIFTDQVLSVLKGE    | ↔    | ↑      | ↔    | ↑      | ↑    | ↔      |
| <b>ATP7A</b>      |      |        |      |        |      |        |
| VESTSNPSSS        | ↔    | ↑      | ↔    | ↑      | ↔    | ↑      |
| <b>DACH1</b>      |      |        |      |        |      |        |
| IKERVPDSPSPAPSLEE | ↑    | ↑      | ↑    | ↔      | ↔    | ↔      |
| KERVPDSPSPAPSLEE  | ↑    | ↑      | ↑    | ↑      | ↔    | ↔      |
| VPDSPSPAPSLEE     | ↔    | ↑      | ↔    | ↔      | ↔    | ↔      |
| <b>DACH2</b>      |      |        |      |        |      |        |
| ESPSPAPSLEE       | ↔    | ↔      | ↔    | ↔      | ↔    | ↔      |
| KERIPESPSPAPSLEE  | ↔    | ↔      | ↔    | ↑      | ↔    | ↔      |
| <b>FAT2</b>       |      |        |      |        |      |        |
| DGSDVSK           | ↓    | ↔      | ↔    | ↔      | ↓    | ↔      |
| <b>FIBA</b>       |      |        |      |        |      |        |
| ADSGEGFLAEGGGVR   | ↔    | ↔      | ↔    | ↑      | ↔    | ↔      |
| DSGEGFLAEGGGVR    | ↔    | ↔      | ↔    | ↔      | ↔    | ↔      |
| GEGFLAEGGGVR      | ↑    | ↑      | ↔    | ↔      | ↔    | ↔      |
| SGEGFLAEGGGVR     | ↑    | ↔      | ↔    | ↔      | ↔    | ↔      |
| <b>IRGQ</b>       |      |        |      |        |      |        |
| LLALPPASPSAARTKA  | ↔    | ↔      | ↔    | ↔      | ↔    | ↔      |
| <b>KNG1</b>       |      |        |      |        |      |        |
| RPPGFSPFR         | ↔    | ↔      | ↔    | ↔      | ↔    | ↔      |
| <b>ZN541</b>      |      |        |      |        |      |        |
| SPSEESPSPGG       | ↔    | ↔      | ↔    | ↔      | ↔    | ↔      |

*Footnote:* Individuals were clinically classified as: 1) patients infected with SARS-CoV-2 not mechanically ventilated or moderate infection (M); 2) patients infected with SARS-CoV-2 mechanically ventilated or severe infection (S); 3) patients infected with SARS-CoV-2 with severe infection that led to death (D); non-SARS-CoV-2-infected individuals (C). The relative levels of the indicated peptide were identified as follows: M/C, moderate vs. control; S/C, severe vs. control; D/C, severe vs. control. Symbols indicate: ↔, no changes in peptide ratio  $p > 0.05$ ; ↑↓, respectively, peptide ratio either increased or decreased,  $p < 0.05$ .
